# Supplementary material for: Spatially-Resolved Network Dynamics of Poly(vinyl alcohol) Gels Measured with Dynamic Small Angle Light Scattering
Source: MDPI journal article supplement (doi:10.3390/gels8070394), 2022-06-22
Supplement: s1 [file s1]

## Supplementary Materials

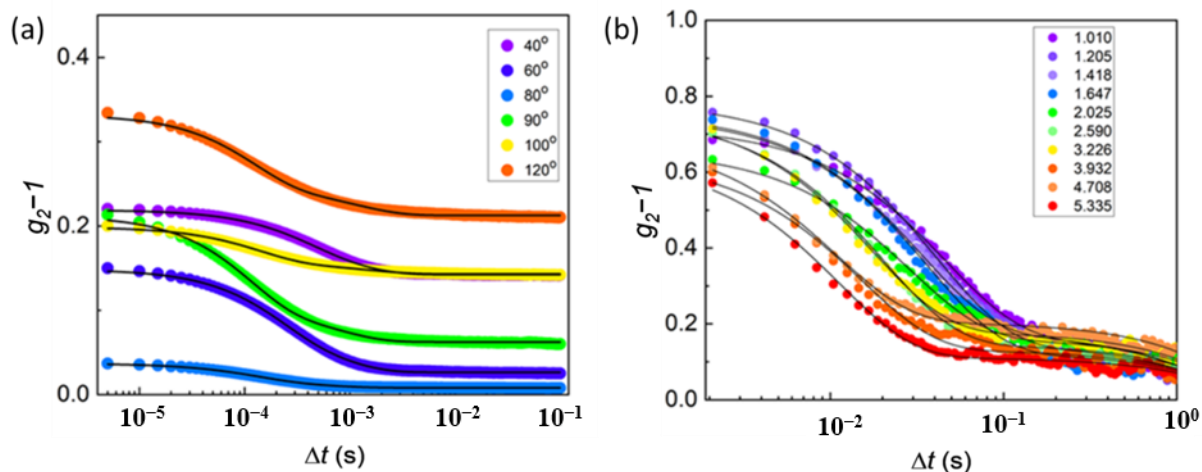

**Figure S1.** PVA dynamics determined from DSALS and DLS. (a) DLS intensity correlation at varying  $\theta$  angles. The black line is a double exponential fit to the data. (b) DSALS intensity correlations at varying  $q$ . The black line is a double exponential fit to the data.

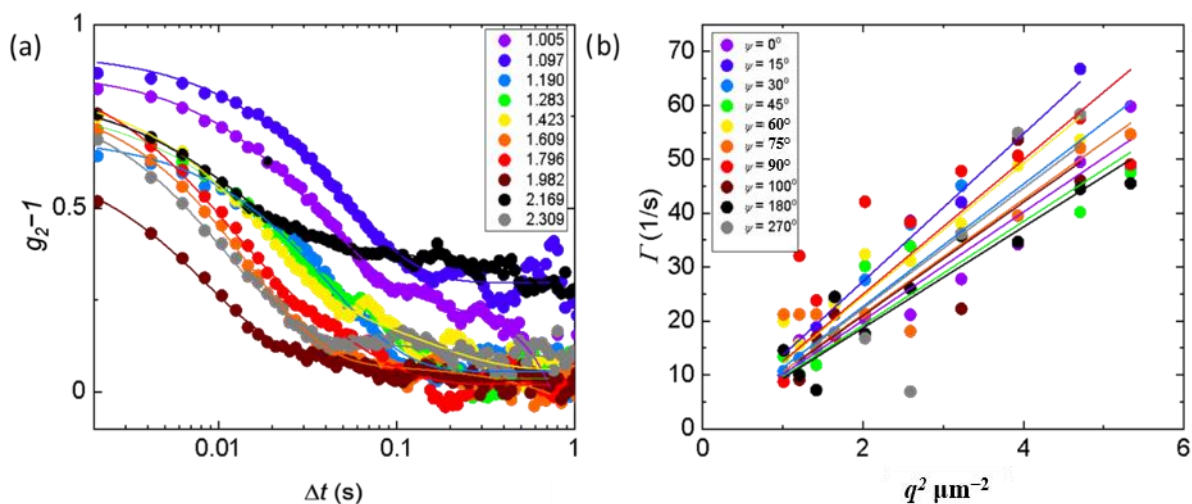

**Figure S2.** Comparison of PVA gel dynamics at different azimuthal angle  $\psi$  via DSALS. (a) DSALS intensity correlation at an azimuthal angle,  $\psi = 45^\circ$ . The black line is a double exponential fit to the data. (b) The dominant fast relaxation rate  $\Gamma$  determined from the exponential fit vs.  $q^2$  as a function of azimuthal angle,  $\psi$ , determined from DSALS.

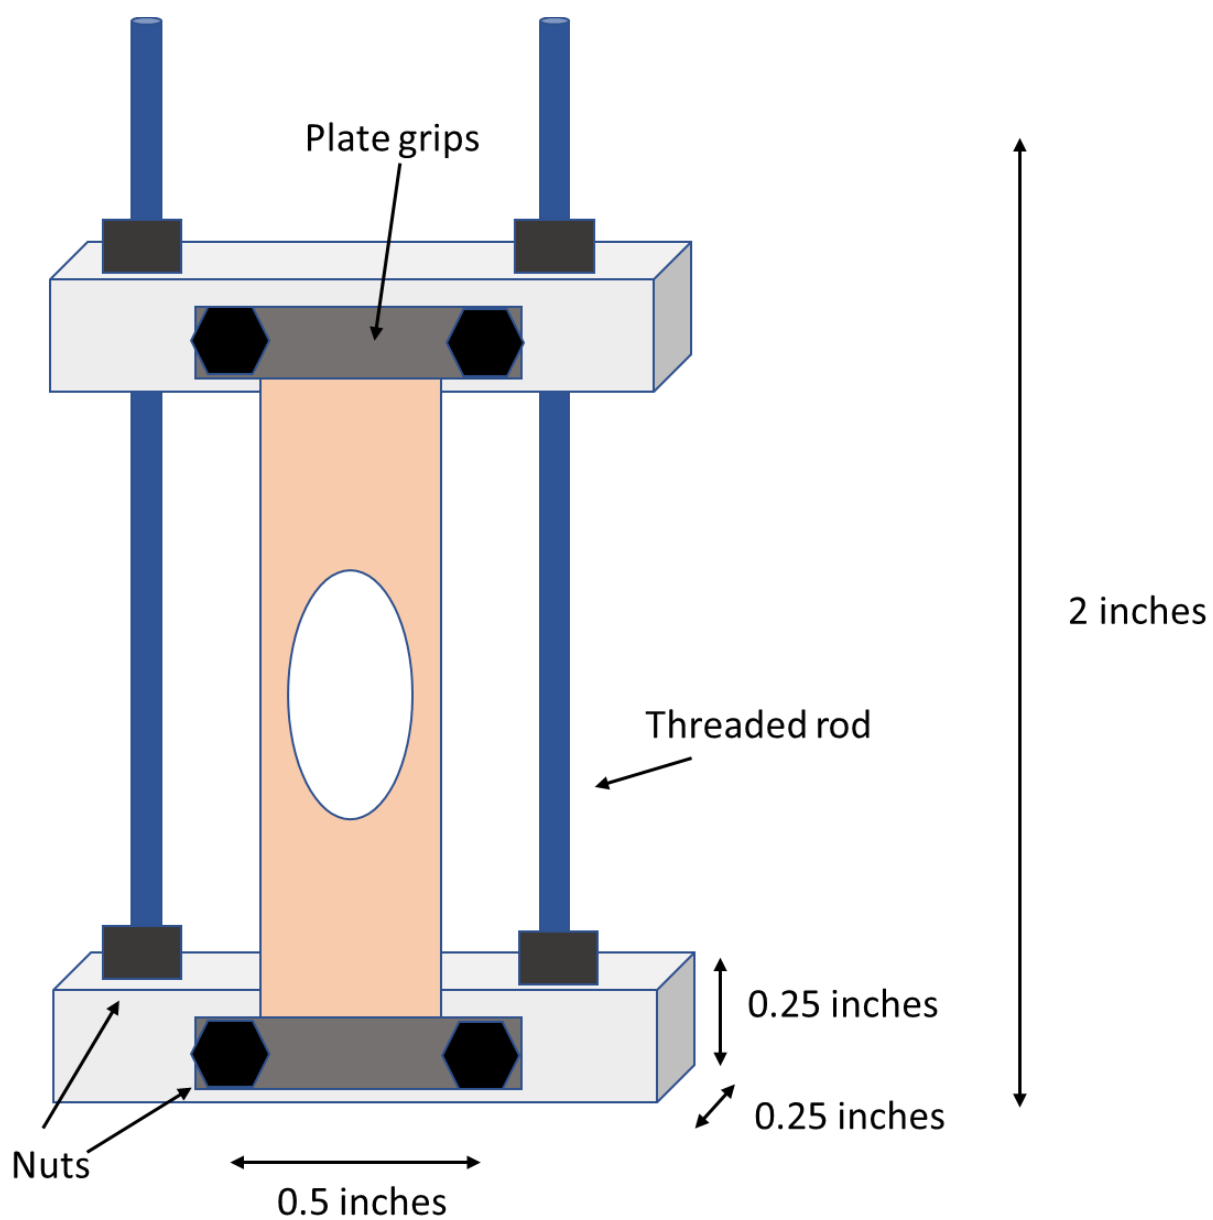

**Figure S3.** Schematic of gel stretching sample holder. The PVA is covalently bound to the silicone mold (peach), such that the mold deformation is translated to the gel.

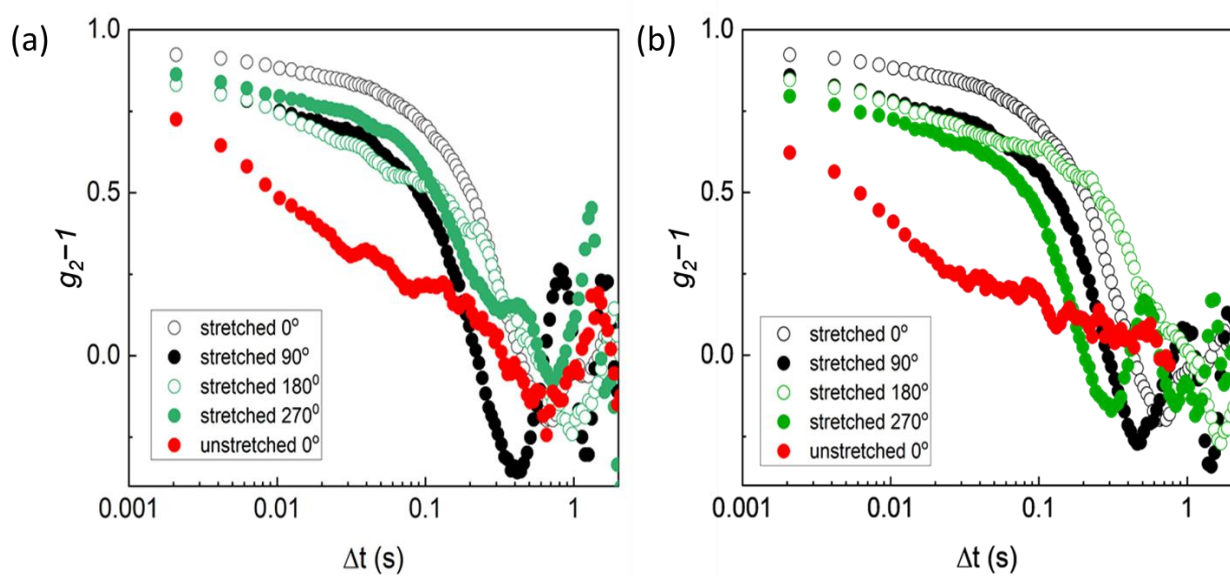

**Figure S4.** Comparison of stretched PVA gel dynamics at different azimuthal angle  $\psi$  via DSALS. (a)  $q = 2.245$ . (b)  $q = 2.124$ .
